# Supplementary material for: Coexistent VO2 (M) and VO2 (B) Polymorphous Thin Films with Multiphase-Driven Insulator–Metal Transition
Source: MDPI journal article supplement (doi:10.3390/nano13091514), 2023-04-28
Supplement: s1 [file s1]

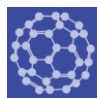

Supplementary Materials

# Coexistent VO<sub>2</sub> (M) and VO<sub>2</sub> (B) polymorphous thin films with multiphase-driven insulator-metal transition

Mengxia Qiu,<sup>ab</sup> Wanli Yang,<sup>c</sup> Peiran Xu,<sup>a</sup> Tiantian Huang,<sup>a</sup> Xin Chen,<sup>\*ac</sup> Ning Dai<sup>\*abc</sup>

<sup>a</sup>State Key Laboratory of Infrared Physics, Shanghai Institute of Technical Physics, Chinese Academy of Sciences, Shanghai 200083, China. Email: xinchen@mail.sitp.ac.cn, ndai@mail.sitp.ac.cn

<sup>b</sup>School of Physical Science and Technology, ShanghaiTech University, Shanghai 201210, China

<sup>c</sup>Hangzhou Institute for Advanced Study, University of Chinese Academy of Sciences, Hangzhou 310024, China

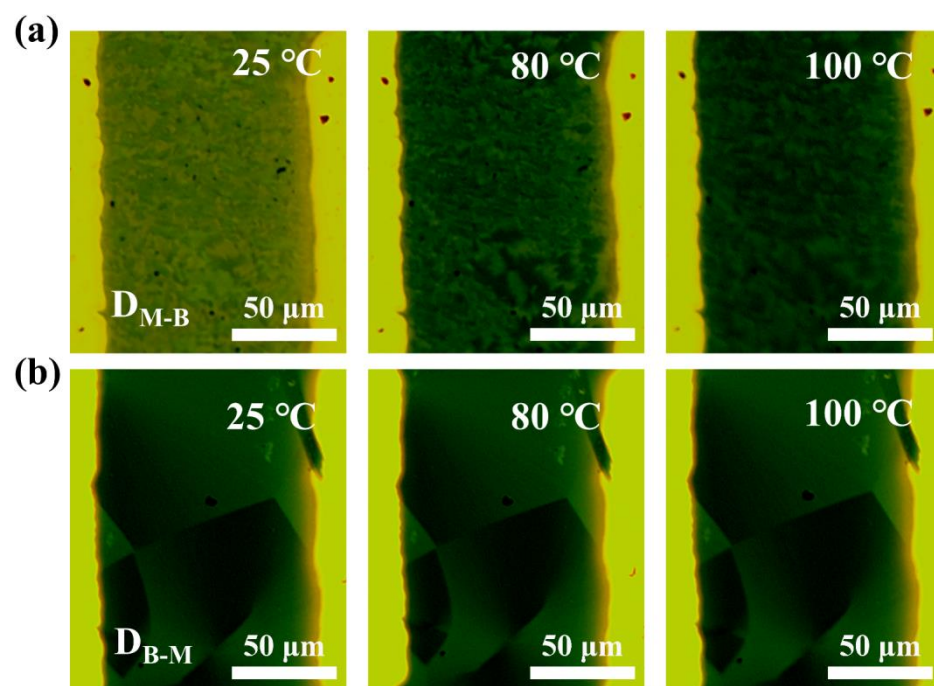

**Figure S1** Temperature-dependent optical microscopy images for the  $D_{M-B}$  (a) and  $D_{B-M}$  (b) thin films at varied temperature.

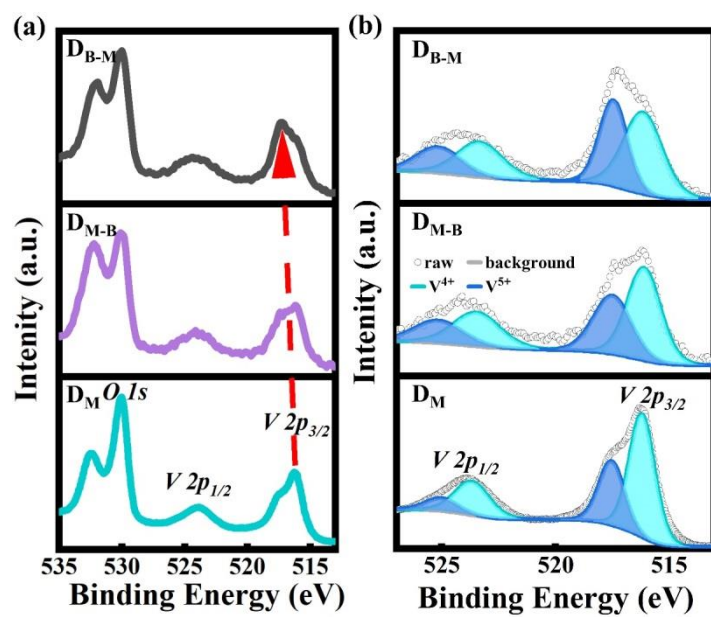

**Figure S2** (a) The V 2p and O 1s XPS spectra and (b) the fitted V 2p XPS spectra for the  $D_M$ ,  $D_{M-B}$  and  $D_{B-M}$  thin films with coexistent  $VO_2$  (M) and  $VO_2$  (B) phases.

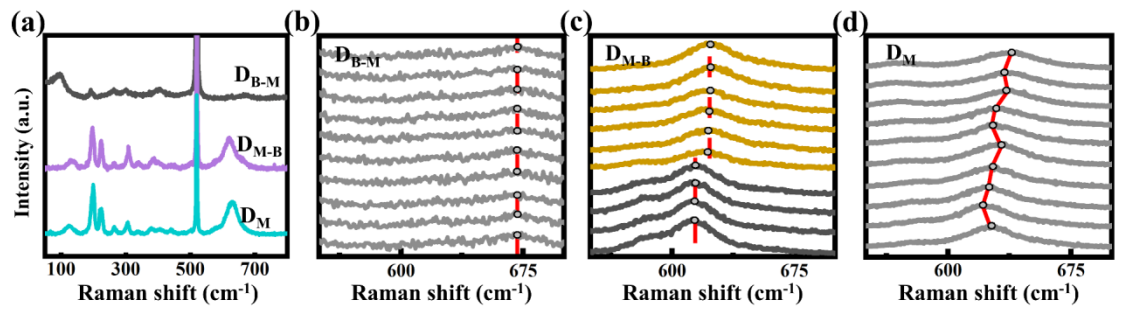

**Figure S3** a) Raman spectra for the polymorphous  $\text{VO}_2$  thin films with Coexistent  $\text{VO}_2$  (M) and  $\text{VO}_2$  (B) phases, and details at around 640  $\text{cm}^{-1}$  for the  $D_{B-M}$  (b),  $D_{M-B}$  (c) and  $D_M$  (d) thin films.

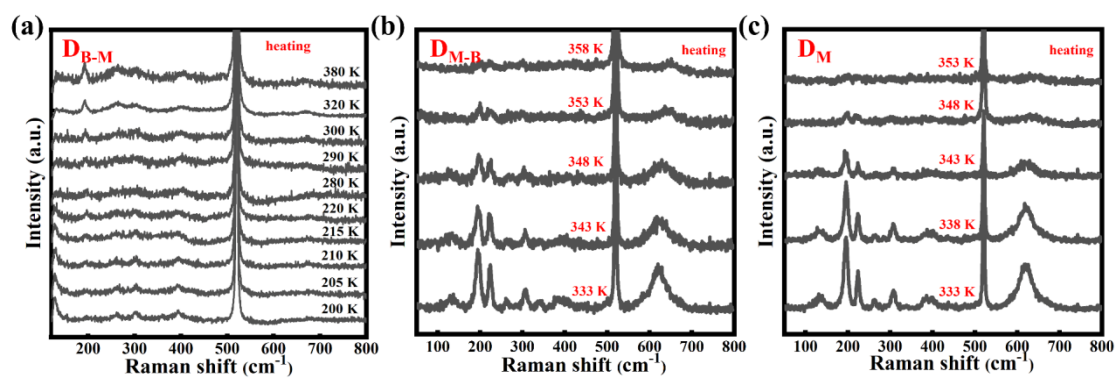

Figure S4 Temperature-dependent Raman spectra for the  $D_{B-M}$  (a),  $D_{M-B}$  (b) and  $D_M$  (c) thin films.

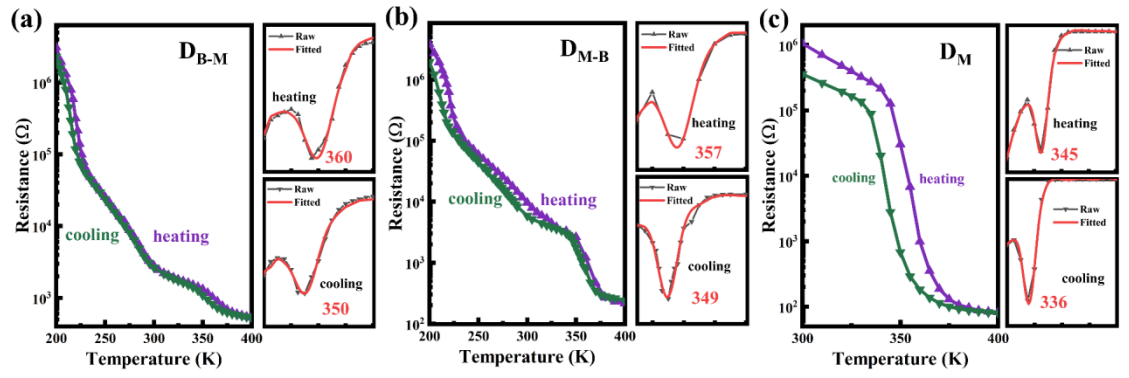

**Figure S5** Temperature-dependent resistance curves and their derivative curves for the  $D_{B-M}$  (a),  $D_{M-B}$  (b) and  $D_M$  (c) thin films.
